# Supplementary material for: Chiral recognition for the complexation dynamics of β-cyclodextrin with the enantiomers of 2-naphthyl-1-ethanol
Source: Royal Society of Chemistry journal article supplement (doi:10.1039/c3pp50298h), 2013-12-06
Supplement: c3pp50298h.pdf [file c3pp50298h.pdf]

## Electronic Supporting Information

### Chiral Recognition for the Complexation Dynamics of $\beta$ -Cyclodextrin with the Enantiomers of 2-Naphthyl-1-ethanol

Hao Tang,<sup>a</sup> Andria S.M. Sutherland,<sup>a</sup> Lana M. Osusky,<sup>a</sup> Yan Li,<sup>b</sup> Josef F. Holzwarth<sup>b</sup> and Cornelia Bohne<sup>\*a</sup>

<sup>a</sup>Department of Chemistry, University of Victoria, PO Box 3065, Victoria, BC V8W 3V6, Canada.

<sup>b</sup> Fritz-Haber-Institut, Department of Physical Chemistry Faradayweg 4-6, 14195 Berlin, Germany.

#### Index

|                                                                                                              |       |
|--------------------------------------------------------------------------------------------------------------|-------|
| Determination of the equilibrium constant $K_{11}$ for the 1:1 NpOH/ $\beta$ -CD complex.                    | 2     |
| Equations S1-S11                                                                                             | 2     |
| NpOH triplet decay in the presence of $\beta$ -CD and nitrite quenching studies                              | 3     |
| Figures S1 and S2                                                                                            | 3     |
| Figure S3                                                                                                    | 4     |
| Time-resolved emission spectra (TRES) and determination of the NpOH monomer and excimer emission intensities | 4     |
| Figure S4                                                                                                    | 4     |
| Equations S12-S15                                                                                            | 4/5   |
| Analysis of the binding isotherms for the formation of 2:2 NpOH: $\beta$ -CD complexes                       | 5     |
| Equations S16-S29                                                                                            | 5/6   |
| Dependence of the $C_{EE}$ values with the $K_E$ values                                                      | 6     |
| Figure S5                                                                                                    | 6     |
| Stopped-flow kinetics for the formation of the EE complex                                                    | 7     |
| Figure S6                                                                                                    | 7     |
| Simulation of stopped-flow experiments                                                                       | 7     |
| Figure S7                                                                                                    | 8     |
| Global analysis of the kinetics for EE formation                                                             | 9     |
| Figure S8                                                                                                    | 9     |
| Derivation of the relationship between the overall kinetics for 2:2 complex and EE complex formation         | 10    |
| Equations S30-S39                                                                                            | 10/11 |
| Table S1                                                                                                     | 11    |

### Determination of the equilibrium constant $K_{11}$ for the 1:1 NpOH/ $\beta$ -CD complex.

Binding isotherms were determined at a low NpOH concentration of 5  $\mu$ M where the 2:2 complex was not present in any significant amount. The fluorescence spectra were integrated between 300 nm and 375 nm. The binding isotherm was fit numerically using the Scientist 3 software (Micromath). The total concentration of  $\beta$ -CD ( $[H_0]$ ) is defined as the independent variable. The equilibrium concentration of free host ( $[H]$ ), free guest ( $[G]$ ), 1:1 complex ( $[HG]$ ) and the fluorescence emission intensity ( $I_{\text{mon}}$ ) are defined as dependent variables. The emission efficiency for the 1:1 complex ( $C_{11}$ ) and the equilibrium binding constant for the 1:1 complex ( $K_{11}$ ) are defined as parameters in the model.  $R$ , the ratio between the fluorescence emission intensity ( $I_{\text{mon},0}$ ) of NpOH in the absence of  $\beta$ -CD and the total concentration of NpOH ( $[G_0]$ , 5  $\mu$ M), is a constant for each independent experiment.  $R$  normalizes the emission efficiency for free NpOH for each experiment and therefore  $C_{11}$  is a relative emission intensity that is constant for different experiments. This normalization is required because different settings on the fluorimeter lead to different absolute fluorescence intensity values for different experiments.

$$[HG] = K_{11}[G][H] \quad (\text{S1})$$

$$[H] = [H_0] - [HG] \quad (\text{S2})$$

$$[G] = 5 \times 10^{-6} - [HG] \quad (\text{S3})$$

$$I_{\text{Mon}} = R \times ([G] + C_{11}[HG]) \quad (\text{S4})$$

$$\text{where } R = \frac{I_{\text{mon},0}}{G_0} \quad (\text{S5})$$

The ranges for the dependent variables were:

$$0 < [H] < 0.01 \text{ M} \quad (\text{S6})$$

$$0 < [G] < 5 \mu\text{M} \quad (\text{S7})$$

$$0 < [HG] < 5 \mu\text{M} \quad (\text{S8})$$

$K_{11}$  was related to both the formation of  $E$  and  $N$ . The binding isotherm for the 1:1 complex only leads to the determination of  $K_{11}$  because there is no spectroscopic signature that can be used to distinguish between  $N$  and  $E$ . The emission efficiencies for  $N$  and  $E$  are very similar because the lifetimes for both complexes are the same. Therefore, the same emission efficiency ( $C_{11}$ ) was assumed for both 1:1 complexes. As a consequence,  $K_{11}$  corresponds to the sum of  $K_E$  and  $K_N$ .

$$I_{\text{Mon}} = C_{\text{Np}}[\text{Np}] + C_{11}[\text{N}] + C_{11}[\text{E}] \quad (\text{S9})$$

$$I_{\text{Mon}} = C_{\text{Np}}[\text{Np}] + C_{11}(K_N + K_E)[\text{Np}][\text{CD}] \quad (\text{S10})$$

$$I_{\text{Mon}} = C_{\text{Np}}[\text{Np}] + C_{11}K_{11}[\text{Np}][\text{CD}] \quad (\text{S11})$$

### NpOH triplet decay in the presence of $\beta$ -CD and nitrite quenching studies.

The decay for the triplet excited state of NpOH in water followed a mono-exponential decay, whereas in the presence of  $\beta$ -CD a fast and a slow decay were observed. The time scales over which these decays occur were quite different (Fig. S1 and S2). In the presence of nitrite anions as a quencher this difference was enhanced because nitrite anions quench the triplet NpOH with short lifetime more efficiently than the long-lived triplet. A step-wise approach was employed to fit the data. Decays were collected simultaneously at long (Fig. S1) and short (Fig. S2) collection times. The values for the observed rate constants depend critically on the off-set value  $a_0$  at the end of the decay. This value was determined from the decay over a long collection time and was fixed for all fits. The decay in the long collection time was fit to a mono-exponential decay to recover a value for  $k_{\text{obs}2}$  (Fig. S1). The fit was started at a time that was ten times longer than the estimated short lifetime, since at this start time the contribution from the short-lived component was negligible. The decay at short collection times includes the decay for the short- and long-lived triplets and requires the fit of the data to the sum of two exponentials (eq. 4 in the paper). However, the long-lived decay is not well defined over this short time scale. For this reason, the values of  $a_0$  and  $k_{\text{obs}2}$  were fixed for the fit. The observed rate constant recovered with this stepwise procedure are similar to those obtained by fitting the whole decays to a sum of two exponentials. However, the  $k_{\text{obs}}$  values are more precise and smaller errors were recovered. The values for  $a_1$  and  $a_2$  were recovered from the fit collected over a short time window.

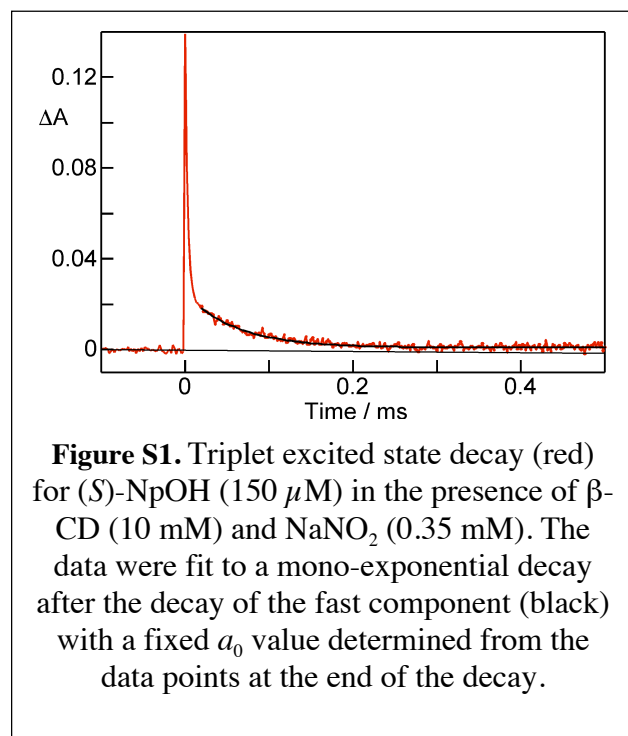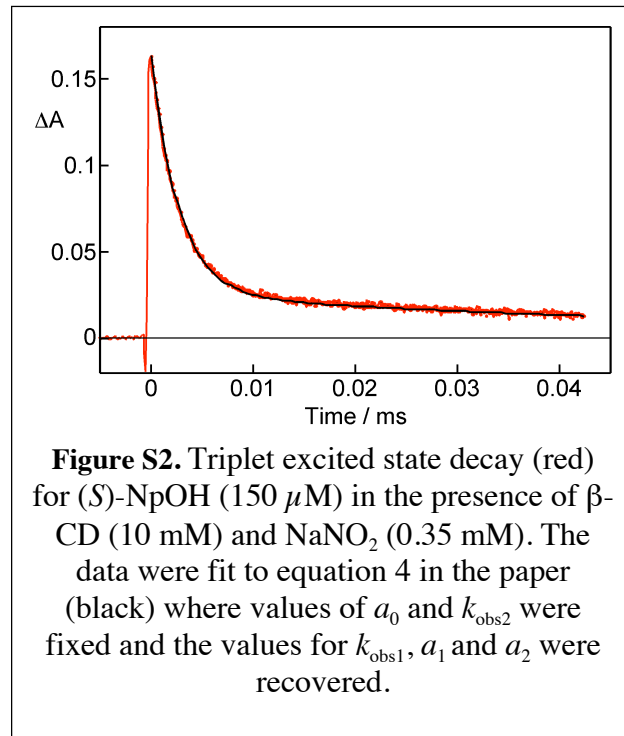

The quenching plots for the short- and long-lived triplet states by nitrite anions were linear (Fig. S3) and the quenching rate constants were obtained using equation 5 in the paper.

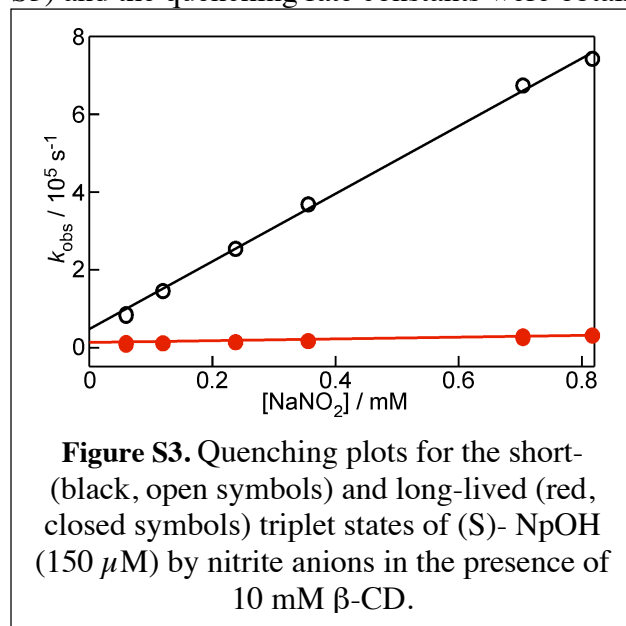

### Time-resolved emission spectra (TRES) and determination of the NpOH monomer and excimer emission intensities.

The TRES at short delays contained the short-lived emission from the monomers of NpOH and the excimer emission from the *EE* complex. As the delays were lengthened the TRES evolved to the broad excimer emission from *EE*.

The determination of the binding isotherm for *EE* requires the correction of the emission intensity for the contribution of monomer emission from *E*, *N*, *EN* and *NN*.

The emission intensity where the monomer predominantly emits ( $I_{330}$ ) was integrated between 322 nm and 338 nm, while the emission intensity where the excimer predominantly emits ( $I_{390}$ ) was integrated between 382 nm and 398 nm. The monomer ( $I_{Mon}$ ) and excimer intensities ( $I_{Ex}$ ) need to be corrected for the intensities of the other species (eqs. S12 and S13), where  $f_1$  is the fraction of the monomer intensity at 330 nm that contributes to the emission intensity at 390 nm and  $f_2$  is the fraction of the excimer emission intensity at 390 nm that contributes to the emission intensity at 330 nm.

$$I_{390} = I_{Mon}f_1 + I_{Ex} \quad (S12)$$

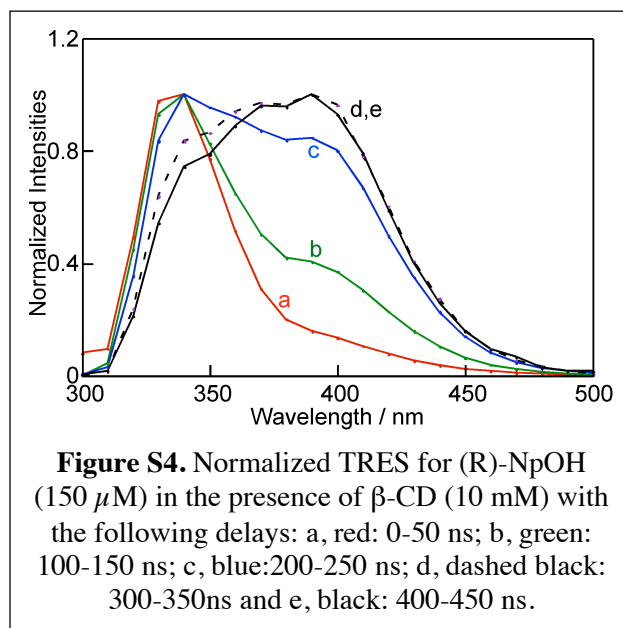

$$I_{330} = I_{Mon} + I_{Ex}f_2 \quad (S13)$$

The value for  $f_1$  was determined to be  $0.036 \pm 0.002$  from the NpOH emission spectrum in water. The excimer emission of NpOH was only observed in the presence of  $\beta$ -CD, and its spectrum was determined using TRES. The value of  $f_2$  was determined to be  $0.565 \pm 0.007$ . Substituting the values for  $f_1$  and  $f_2$  into equations S12 and S13, and rearranging the equations led to:

$$I_{Mon} = 1.02I_{330} - 0.58I_{390} \quad (S14)$$

$$I_{Ex} = 1.02I_{390} - 0.037I_{330} \quad (S15)$$

The corrected monomer emission ( $I_{Mon}$ ) for NpOH in the absence of  $\beta$ -CD was normalized with respect to the NpOH concentration in order to compare experiments performed on different days.

### Analysis of the binding isotherms for the formation of 2:2 NpOH: $\beta$ -CD complexes.

The excimer emission corresponds to the formation of the *EE* complex. The binding isotherm was fit using the Scientist 3 software. The equilibria for the formation of the 1:1 complexes (*E* and *N*) and for all three 2:2 complex (*EE*, *NN*, *EN*) are coupled and the binding isotherm for *EE* contains information for all equilibria (see scheme 2 in the paper). The total concentration of  $\beta$ -CD ( $[H_0]$ ) is defined as the independent variable. The emission efficiency  $C_{EE}$  corresponds to the relative emission efficiency that was normalized to the monomer emission for NpOH in the absence of  $\beta$ -CD ( $[G]_0$ ) and is constant for different experiments. The equilibrium concentrations for *H*, *G*, *E*, *N*, *EE*, *EN*, *NN* and the fluorescence emission intensity for *EE* ( $I_{EE}$ ) were defined as dependent variables. The relative emission efficiency for the *EE* complex ( $C_{EE}$ ), the equilibrium constant for the *E* complex ( $K_E$ ) and the equilibrium constant for the *EE* complex ( $K_{EE}$ ) were defined as parameters in the model. The total concentration of NpOH species was 150  $\mu$ M.

$$[E] = K_E[G][H] \quad (S16)$$

$$[N] = (K_{11} - K_E)[G][H] \quad (S17)$$

$$[EE] = K_{EE}[E]^2 \quad (S18)$$

$$[EN] = K_{EN}[E][N] \quad (S19)$$

$$[NN] = K_{NN}[N]^2 \quad (S20)$$

$$[H_0] = [H] + [E] + [N] + 2([EE] + [EN] + [NN]) \quad (S21)$$

$$1.50 \times 10^{-4} = [G] + [E] + [N] + 2([EE] + [EN] + [NN]) \quad (S22)$$

$$I_{Ex} = C_{EE}[EE] \quad (S23)$$

The ranges for the dependent variables were:

$$0 < [\text{H}] < 0.01 \text{ M} \quad (\text{S24})$$

$$0 < [\text{E}] < 150 \text{ } \mu\text{M} \quad (\text{S25})$$

$$0 < [\text{N}] < 150 \text{ } \mu\text{M} \quad (\text{S26})$$

$$0 < [\text{EE}] < 75 \text{ } \mu\text{M} \quad (\text{S27})$$

$$0 < [\text{EN}] < 75 \text{ } \mu\text{M} \quad (\text{S28})$$

$$0 < [\text{NN}] < 75 \text{ } \mu\text{M} \quad (\text{S29})$$

The values for  $K_{\text{EE}}$ ,  $K_{\text{NN}}$  and  $K_{\text{EN}}$  were considered equal based on the observation of one relaxation process in the kinetics for *EE* formation and the values for  $K_{\text{E}}$  were fixed to incremental values between 0 and 1,100  $\text{M}^{-1}$ , where the latter value corresponds to  $K_{11}$ .

#### Dependence of the $C_{\text{EE}}$ values with the $K_{\text{E}}$ values.

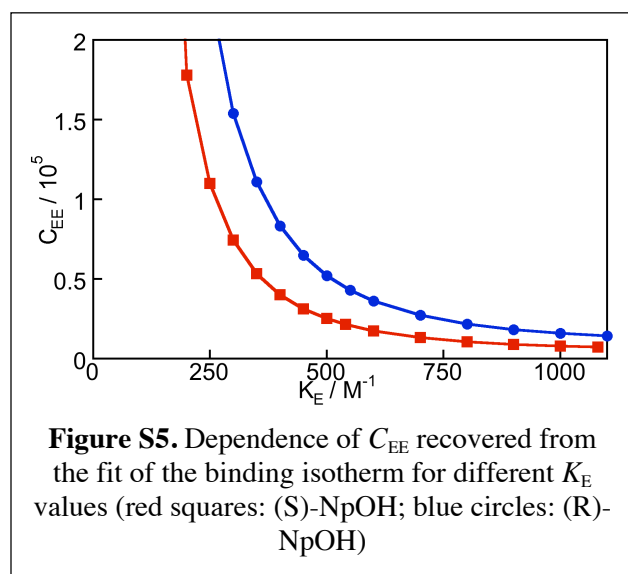

### Stopped-flow kinetics for the formation of the *EE* complex.

All kinetic traces fit adequately to an exponential function when fit individually. Figure S6 shows the fits for the trace with the largest amplitude (300  $\mu\text{M}$  (R)-NpOH, 100  $\mu\text{M}$   $\beta$ -CD) and the trace with the smallest amplitude (50  $\mu\text{M}$  (R)-NpOH, 50  $\mu\text{M}$   $\beta$ -CD). The residuals were random in all cases.

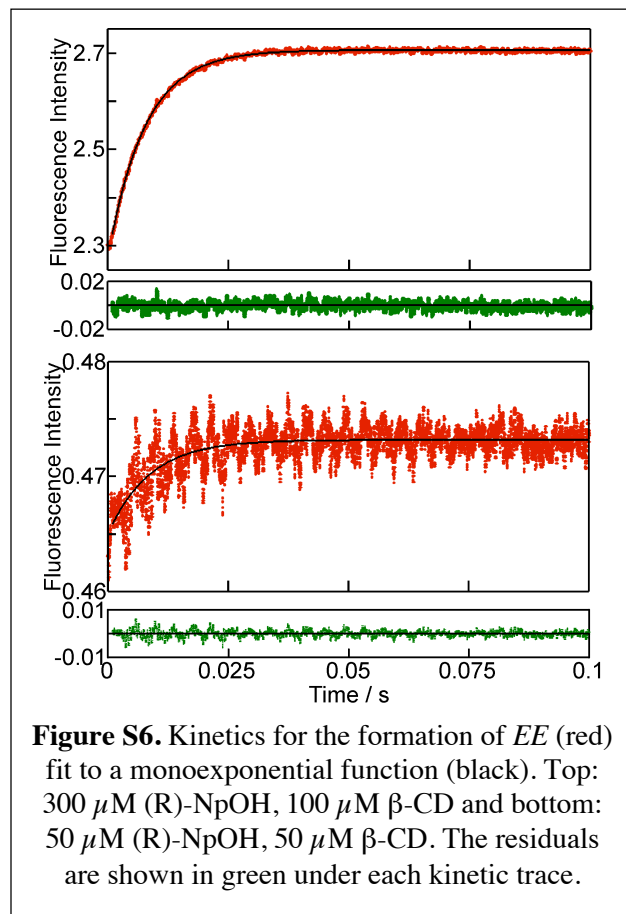

**Figure S6.** Kinetics for the formation of *EE* (red) fit to a monoexponential function (black). Top: 300  $\mu\text{M}$  (R)-NpOH, 100  $\mu\text{M}$   $\beta$ -CD and bottom: 50  $\mu\text{M}$  (R)-NpOH, 50  $\mu\text{M}$   $\beta$ -CD. The residuals are shown in green under each kinetic trace.

### Simulation of stopped-flow experiments.

Simulations of the kinetics were conducted to check to what extent a difference between the rate constants for the formation of different 2:2 complexes (*EE*, *EN* and *NN*) would lead to two relaxation processes that can be differentiated in the kinetic measurements. The model for the simulations included the formation of the *E* and *N* 1:1 complexes as fast equilibria ( $K_E$  and  $K_N$ ), and the formation of the 2:2 complexes were expressed by their respective association ( $k_+^{EE}$ ,  $k_+^{EN}$  and  $k_+^{NN}$ ) and dissociation rate constants ( $k_-^{EE}$ ,  $k_-^{EN}$  and  $k_-^{NN}$ ). The simulations were performed with the Pro-Kineticist II software and random noise was added by selecting a signal-to-noise ratio in the software that was similar to that observed in the experiments. The simulated data were then fit to the same model used to fit the experimental data (Scheme 3 in the paper) and the residuals between the simulated data and the fit were analyzed. Non-random residuals indicated that the parameters used in the simulations would be apparent in the kinetic experiment as an additional relaxation process.

The simulated kinetic traces were generated by two methods: (i) Varying the association rate constants for the *NN* ( $k_+^{NN}$ ) and *EN* complexes ( $k_+^{EN}$ ) while other parameters ( $K_E$ ,  $K_N$ ,  $k_+^{EE}$  and the

dissociation rate constants for all 2:2 complexes) were fixed. The dissociation rate constants for all 2:2 complexes were set to the same value. (ii) Varying the dissociation rate constants for the *NN* ( $k_-^{NN}$ ) and *EN* complex ( $k_-^{EN}$ ) while other parameters ( $K_E$ ,  $K_N$ ,  $k_+^{EE}$  and the association rate constants for all 2:2 complexes) were fixed. The association rate constants for all 2:2 complexes were set to the same value. Moreover, for methods (i) and (ii) the simulations were conducted under three different conditions to check how the ratio of  $K_E$  to  $K_N$  affected the differentiation of two kinetic relaxation processes: (a) the value of  $K_E$  was equal to that of  $K_N$ . (b) The value of  $K_E$  was higher than that of  $K_N$ , e.g. the value of  $K_E$  was 5 times higher than that of  $K_N$ . (c) The value of  $K_E$  was lower than that of  $K_N$ , e.g. the value of  $K_E$  was 5 times lower than that of  $K_N$ . An example for a simulation is shown in figure S7 when  $K_E$  is equal to  $K_N$ . Deviations were observed when the difference in the association rate constants for *EE* compared to *EN* and *NN* was larger than 5%. Residuals in panels “b”, “c” and “d” in figure S7 were considered acceptable while residuals in panels “a” and “e” were considered to have significant deviations. Deviations were observed at different relative values depending on the scenarios (a) to (c) described above. The maximum differential before deviations between the simulated data and the model were observed were 25% between  $k_+^{EE}$  and  $k_+^{EN}/k_+^{NN}$  and 20% for the dissociation rate constants.

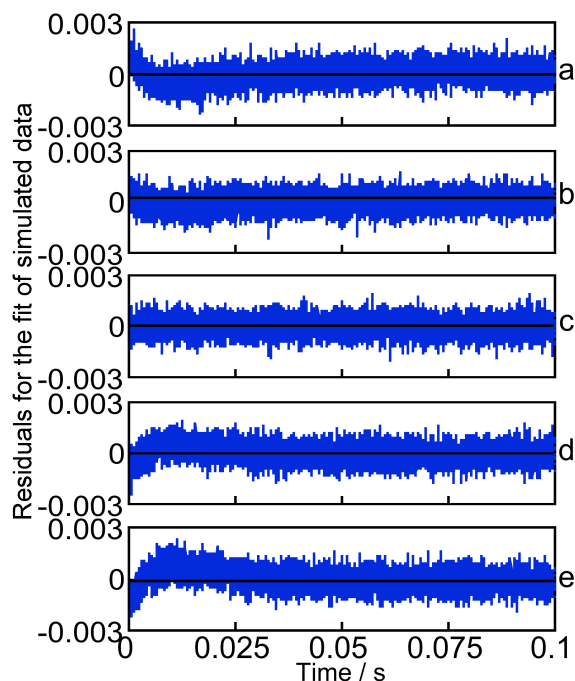

**Figure S7.** Residuals between simulated data and the model used for analysis of the experimental data. The simulated data were generated with the following values:  $[NpOH] = 300 \mu M$ ,  $[\beta\text{-CD}] = 100 \mu M$ ,  $K_E = 500 M^{-1}$ ,  $K_N = 500 M^{-1}$ ,  $k_+^{EE} = 9.28 \times 10^5 M^{-1} s^{-1}$ , the dissociation rate constants for all 2:2 complexes were set to  $115 s^{-1}$ . The association rate constants for *EN* and *NN* had the same value and were set to different percentages of  $k_+^{EE}$ : (a) 90%, (b) 95%, (c) 100%, (d) 105%, (e) 110%.



### Global analysis of the kinetics for *EE* formation.

The kinetics at the different concentrations of NpOH and  $\beta$ -CD were simultaneously fit to the mechanism shown in scheme 3 using a global analysis method in Pro-Kineticist II (Applied Photophysics). The residuals for all kinetic traces were random (Fig. S8).

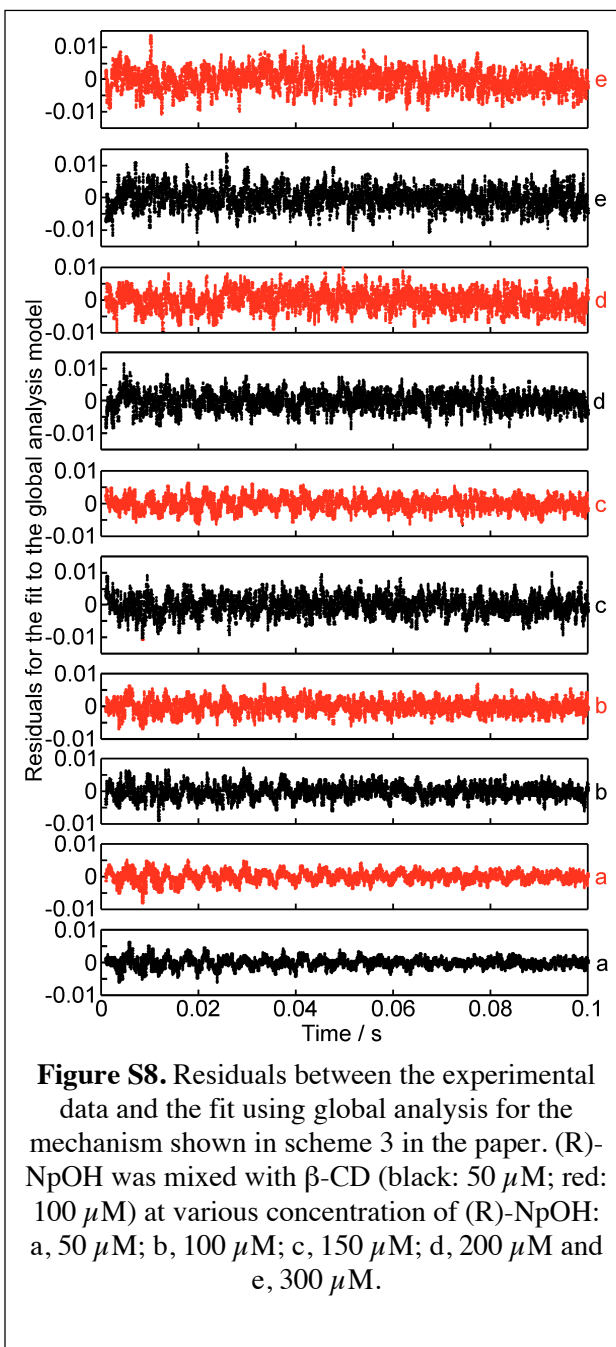

### Derivation of the relationship between the overall kinetics for 2:2 complex and *EE* complex formation.

The overall formation of 2:2 complexes leads to the following differential equation:

$$\frac{d[\text{Np}_2 \bullet \text{CD}_2]}{dt} = k_+^{22}[\text{Np} \bullet \text{CD}]^2 - k_-^{22}[\text{Np}_2 \bullet \text{CD}_2] \quad (\text{S30})$$

while the differential equation for the formation of the *EE* complex is given by:

$$\frac{d[\text{EE}]}{dt} = k_+^{\text{EE}}[\text{E}]^2 - k_-^{22}[\text{EE}] \quad (\text{S31})$$

The concentration of the 2:2 complexes is related to the concentration of the individual complexes. The assumption was made that the equilibrium constants for *EE*, *EN* and *NN* are the same.

$$[\text{Np}_2 \bullet \text{CD}_2] = K_{\text{EE}}[\text{E}]^2 + K_{\text{EN}}[\text{E}][\text{N}] + K_{\text{NN}}[\text{N}]^2 \quad (\text{S32})$$

$$[\text{Np}_2 \bullet \text{CD}_2] = K_{\text{EE}}([\text{E}]^2 + [\text{E}][\text{N}] + [\text{N}]^2) \quad (\text{S33})$$

$$[\text{N}] = \frac{K_{\text{N}}}{K_{\text{E}}}[\text{E}] \quad (\text{S34})$$

$$[\text{Np}_2 \bullet \text{CD}_2] = \left(1 + \frac{K_{\text{N}}}{K_{\text{E}}} + \left(\frac{K_{\text{N}}}{K_{\text{E}}}\right)^2\right) K_{\text{EE}}[\text{E}]^2 \quad (\text{S35})$$

$$[\text{E}]^2 = \frac{[\text{EE}]}{K_{\text{EE}}} \quad (\text{S36})$$

$$[\text{Np} \bullet \text{CD}] = [\text{E}] + [\text{N}] = \left(1 + \frac{K_{\text{N}}}{K_{\text{E}}}\right) [\text{E}] \quad (\text{S37})$$

Substituting equations S35 and S37 into equation S30 and substituting  $[\text{E}]^2$  by equation S36:

$$\frac{d\left(1 + \frac{K_{\text{N}}}{K_{\text{E}}} + \left(\frac{K_{\text{N}}}{K_{\text{E}}}\right)^2\right) [\text{EE}]}{dt} = k_+^{22} \left(1 + \frac{K_{\text{N}}}{K_{\text{E}}}\right)^2 [\text{E}]^2 - k_-^{22} \left(1 + \frac{K_{\text{N}}}{K_{\text{E}}} + \left(\frac{K_{\text{N}}}{K_{\text{E}}}\right)^2\right) [\text{EE}] \quad (\text{S38})$$

$$\frac{d[EE]}{dt} = \frac{\left(1 + \frac{K_N}{K_E}\right)^2}{\left(1 + \frac{K_N}{K_E} + \left(\frac{K_N}{K_E}\right)^2\right)} k_+^{EE} [E]^2 - k_-^{EE} [EE] \tag{S39}$$

**Table S1.** Limiting values for the association ( $k_+^{EE}$ ) and dissociation ( $k_-^{EE}$ ) rate constants and equilibrium constants for *EE* formation derived from the fitting of kinetic data ( $K_{EE,st}$ ) and of fluorescence data ( $K_{EE,flu}$ ), and the relative emission efficiency ( $C_{EE}$ ).

|                                 | NpOH | $k_+^{EE} / 10^5 \text{ M}^{-1} \text{ s}^{-1}$ | $k_-^{EE} / 10^2 \text{ s}^{-1}$ | $K_{EE,st} / 10^3 \text{ M}^{-1}$ | $K_{EE,flu} / 10^3 \text{ M}^{-1}$ | $C_{EE} / 10^4$ |
|---------------------------------|------|-------------------------------------------------|----------------------------------|-----------------------------------|------------------------------------|-----------------|
| $K_E = K_{II}$                  | (R)- | $9.2 \pm 0.4$                                   | $1.11 \pm 0.05$                  | $8.3 \pm 0.5$                     | $7.8 \pm 0.3$                      | $4.30 \pm 0.08$ |
|                                 | (S)- | $9.6 \pm 0.5$                                   | $1.63 \pm 0.02$                  | $5.9 \pm 0.3$                     | $6.0 \pm 0.3$                      | $2.16 \pm 0.04$ |
| $K_E = K_{I1}$<br>( $K_N = 0$ ) | (R)- | $6.9 \pm 0.3$                                   | $1.11 \pm 0.05$                  | $6.2 \pm 0.4$                     | $5.8 \pm 0.2$                      | $1.43 \pm 0.03$ |
|                                 | (S)- | $7.2 \pm 0.4$                                   | $1.63 \pm 0.02$                  | $4.4 \pm 0.2$                     | $4.5 \pm 0.2$                      | $0.71 \pm 0.01$ |
| $K_N = K_{I1}$<br>( $K_E = 0$ ) | (R)- | not defined                                     | $1.11 \pm 0.05$                  | not defined                       | $5.8 \pm 0.2$                      | $\infty$        |
|                                 | (S)- | not defined                                     | $1.63 \pm 0.02$                  | not defined                       | $4.5 \pm 0.2$                      | $\infty$        |
